# Supplementary material for: An in vitro digestion method adapted for carotenoids and carotenoid esters: moving forward towards standardization
Source: Royal Society of Chemistry journal article supplement (doi:10.1039/c6fo01293k), 2016-01-01
Supplement: c6fo01293k1.pdf [file c6fo01293k1.pdf]

**IN VITRO DIGESTION METHOD ADAPTED FOR CAROTENOIDS AND CAROTENOID ESTERS: MOVING FORWARD TOWARDS STANDARDIZATION**

Daniele Bobrowski Rodrigues, Lilian Regina Barros Mariutti<sup>#</sup> and Adriana Zerlotti Mercadante\*

**Electronic Supplementary Material**

**Table S.1** Amount of enzymes (g) used per each 1.0 g of rehydrated murici in *in vitro* bioaccessibility protocols.

|                   | <b>Xavier modified</b> | <b>INFOGEST adapted</b> |
|-------------------|------------------------|-------------------------|
| <b>α-amylase</b>  | na                     | 0.0019                  |
| <b>pepsin</b>     | 0.005                  | 0.01                    |
| <b>pancreatin</b> | 0.08                   | 0.006                   |
| <b>lipase</b>     | 0.0132                 | na                      |

na=not applicable

**Table S.2** Carotenoid content ( $\mu\text{g}\cdot\text{g}^{-1}$  dw) from murici fruit and its micellar fractions obtained after *in vitro* digestion protocols.

| Peak <sup>a</sup> | Carotenoid                                                             | Murici fruit | Xavier modified | Xavier modified + SF | INFOGEST adapted |
|-------------------|------------------------------------------------------------------------|--------------|-----------------|----------------------|------------------|
| 1                 | (13Z)-lutein or (13'Z)-lutein                                          | 1.2 ± 0.0    | 0.3 ± 0.1       | 0.2 ± 0.0            | 0.2 ± 0.0        |
| 2                 | (all-E)trans-lutein                                                    | 11.7 ± 0.5   | 2.3 ± 0.4       | 0.7 ± 0.2            | 3.4 ± 0.3        |
| 3                 | (all-E)-zeaxanthin                                                     | 3.7 ± 0.2    | 0.5 ± 0.1       | 0.2 ± 0.1            | 0.8 ± 0.1        |
| 4                 | (9Z)-lutein                                                            | 1.0 ± 0.0    | 0.2 ± 0.0       | 0.1 ± 0.0            | 0.3 ± 0.0        |
| 5                 | (9'Z)-lutein                                                           | 1.0 ± 0.0    | 0.2 ± 0.0       | 0.1 ± 0.0            | 0.2 ± 0.0        |
| 6                 | (all-E)-neochrome myristate                                            | 1.0 ± 0.0    | 0.2 ± 0.0       | 0.1 ± 0.0            | 0.2 ± 0.0        |
| 7                 | (all-E)-neochrome palmitate + lutein 3'-O-caprate + lutein 3-O-caprate | 1.3 ± 0.1    | 0.3 ± 0.0       | 0.2 ± 0.0            | 0.3 ± 0.0        |
| 8                 | (Z)-lutein 3'-O-laurate                                                | 1.0 ± 0.0    | 0.2 ± 0.0       | 0.1 ± 0.0            | 0.2 ± 0.0        |
| 9                 | (Z)-lutein 3-O-laurate                                                 | 1.2 ± 0.0    | 0.2 ± 0.0       | 0.2 ± 0.0            | 0.2 ± 0.0        |
| 10                | (13Z)-lutein 3-O-myristate                                             | 0.7 ± 0.0    | 0.2 ± 0.0       | 0.1 ± 0.0            | 0.2 ± 0.0        |
| 11                | (all-E)-lutein 3'-O-myristate                                          | 1.3 ± 0.1    | 0.3 ± 0.0       | 0.2 ± 0.0            | 0.3 ± 0.0        |
| 12                | (13'Z)-lutein 3-O-myristate                                            | 0.8 ± 0.0    | 0.1 ± 0.0       | 0.1 ± 0.0            | 0.2 ± 0.0        |
| 13                | (all-E)-lutein 3-O-myristate + (all-E)- $\beta$ -carotene              | 3.7 ± 0.1    | 0.5 ± 0.0       | 0.3 ± 0.1            | 0.6 ± 0.1        |
| 14                | (13Z)-lutein 3-O-palmitate or (13'Z)-lutein 3-O-palmitate              | 0.8 ± 0.0    | 0.2 ± 0.0       | 0.1 ± 0.0            | 0.2 ± 0.0        |
| 15                | zeaxanthin myristate                                                   | 0.6 ± 0.0    | 0.1 ± 0.0       | 0.1 ± 0.0            | 0.1 ± 0.0        |
| 16                | (all-E)-lutein 3-O-palmitate                                           | 1.1 ± 0.0    | 0.2 ± 0.0       | 0.1 ± 0.0            | 0.2 ± 0.0        |

|              |                                                                                                                                                 |                   |                  |                  |                   |
|--------------|-------------------------------------------------------------------------------------------------------------------------------------------------|-------------------|------------------|------------------|-------------------|
| 17           | ( <i>Z</i> )-violaxanthin dimyristate                                                                                                           | 1.5 ± 0.1         | 0.1 ± 0.0        | 0.1 ± 0.0        | 0.3 ± 0.0         |
| 18           | ( <i>Z</i> )-violaxanthin myristate palmitate                                                                                                   | 1.8 ± 0.1         | 0.1 ± 0.0        | 0.2 ± 0.0        | 0.3 ± 0.0         |
| 19           | ( <i>Z</i> )-violaxanthin myristate palmitate                                                                                                   | 1.2 ± 0.0         | 0.1 ± 0.0        | 0.1 ± 0.0        | 0.2 ± 0.0         |
| 20           | ( <i>Z</i> )-violaxanthin dipalmitate                                                                                                           | 0.7 ± 0.0         | 0.1 ± 0.0        | 0.1 ± 0.0        | 0.2 ± 0.0         |
| 21           | β-cryptoxanthin myristate+ lutein dilaurate                                                                                                     | 0.9 ± 0.0         | 0.1 ± 0.0        | 0.2 ± 0.0        | 0.2 ± 0.0         |
| 22           | (all- <i>E</i> )-lutein 3- <i>O</i> -myristate-3'- <i>O</i> -laurate                                                                            | 2.3 ± 0.1         | 0.2 ± 0.0        | 0.2 ± 0.0        | 0.5 ± 0.0         |
| 23           | (13 <i>Z</i> )-lutein dimyristate                                                                                                               | 1.4 ± 0.0         | 0.1 ± 0.0        | 0.1 ± 0.0        | 0.3 ± 0.0         |
| 24           | (13' <i>Z</i> )-lutein dimyristate                                                                                                              | 1.0 ± 0.0         | 0.1 ± 0.0        | 0.1 ± 0.0        | 0.2 ± 0.0         |
| 25           | (all- <i>E</i> )-lutein dimyristate                                                                                                             | 5.1 ± 0.2         | 0.2 ± 0.0        | 0.3 ± 0.1        | 0.9 ± 0.1         |
| 26           | ( <i>Z</i> )-lutein 3- <i>O</i> -myristate-3'- <i>O</i> -palmitate                                                                              | 1.4 ± 0.0         | 0.1 ± 0.0        | 0.2 ± 0.0        | 0.3 ± 0.0         |
| 27           | ( <i>Z</i> )-zeaxanthin dimyristate                                                                                                             | 1.1 ± 0.0         | 0.1 ± 0.0        | 0.1 ± 0.0        | 0.2 ± 0.0         |
| 28           | (all- <i>E</i> )-lutein 3- <i>O</i> -myristate-3'- <i>O</i> -palmitate + (all- <i>E</i> )-lutein 3'- <i>O</i> -myristate-3- <i>O</i> -palmitate | 3.0 ± 0.1         | 0.2 ± 0.0        | 0.2 ± 0.0        | 0.6 ± 0.0         |
| 29           | ( <i>Z</i> )-lutein myristate-palmitate                                                                                                         | 0.9 ± 0.0         | 0.1 ± 0.0        | 0.1 ± 0.0        | 0.2 ± 0.0         |
| 30           | (all- <i>E</i> )-lutein dipalmitate                                                                                                             | 1.1 ± 0.0         | 0.1 ± 0.0        | 0.1 ± 0.0        | 0.3 ± 0.0         |
| <b>Total</b> |                                                                                                                                                 | <b>55.9 ± 1.4</b> | <b>8.3 ± 0.6</b> | <b>5.4 ± 0.6</b> | <b>12.4 ± 0.8</b> |

Carotenoids were quantified by HPLC-DAD using external analytical curves. Carotenoid contents are expressed as mean ± sd (n=3). <sup>a</sup> Numbered according to Figure 2.
